# Supplementary material for: Elucidating mechanisms for insect body size: partial support for the oxygen-dependent induction of moulting hypothesis
Source: Oxford University Press journal article supplement (doi:10.1242/jeb.166157), 2017-01-01
Supplement: jeb166157supp.pdf [file jeb166157supp.pdf]

## Supplementary material

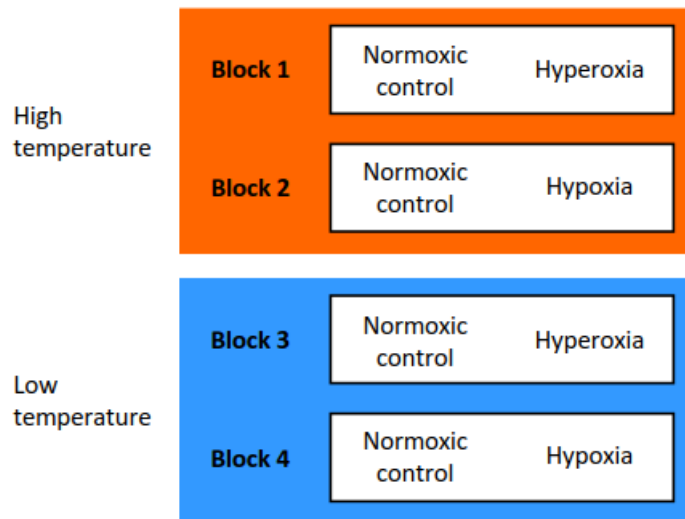

**Figure S1.** Experimental design. The experiment was organized as four temporally separate blocks (blocks 1–4), each of which included the normoxic control and either a hyperoxic (blocks 1 and 3) or hypoxic (blocks 2 and 4) manipulation. Two first blocks (blocks 1 and 2) were carried out at high temperature manipulation and two last blocks (blocks 3 and 4) at low temperature manipulation. Split-brood design was used within each block so that broods were split between the oxygen partial pressure manipulations. Because of the temporal separation of the experimental blocks, the short life span of *O. gothica* females and the clutch-laying habit of the species (a clutch consists of a large amount of eggs glued to each other), it was not possible to use the same broods in more than a single block.

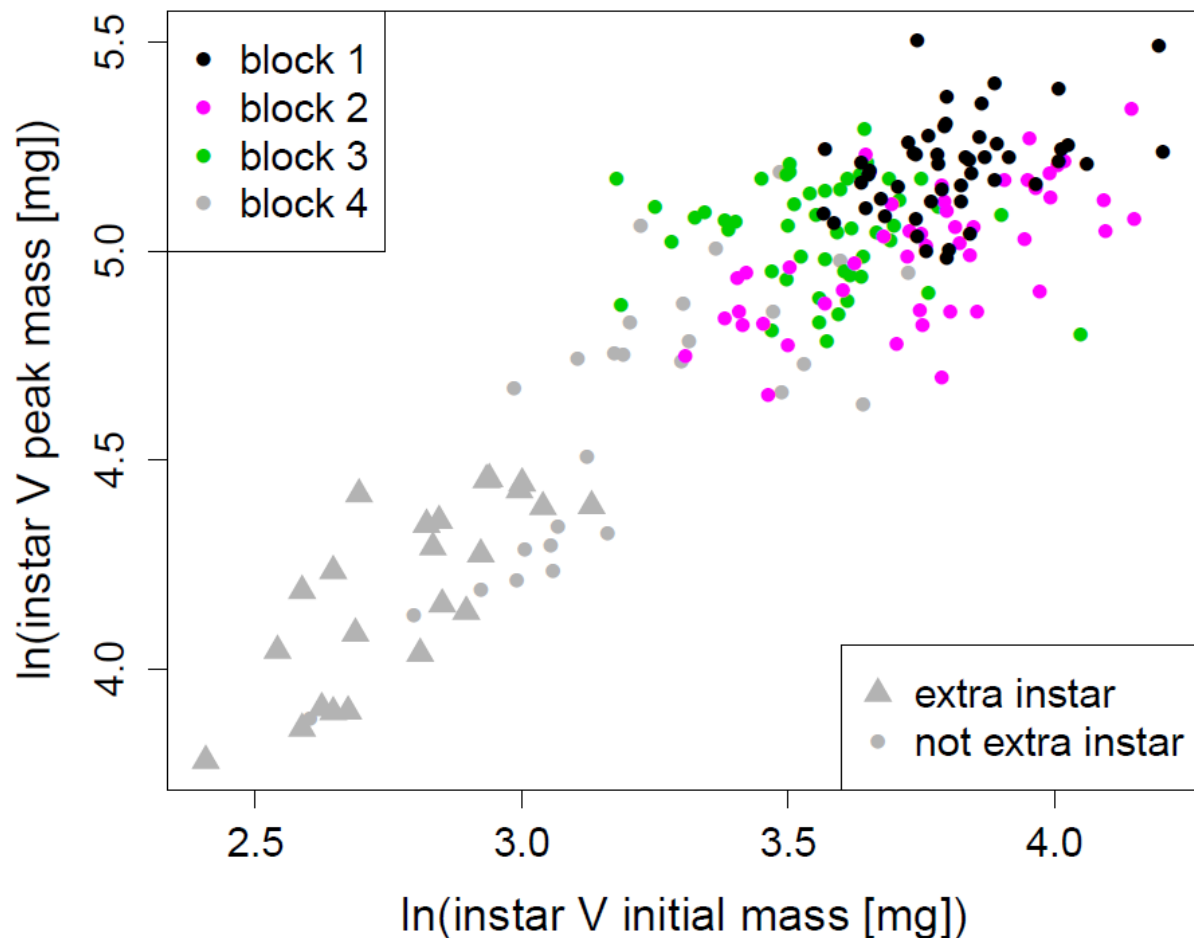

**Figure S2.** Peak mass of instar V shown in relation to the initial mass of the instar (both  $\ln$ -transformed) in the four experimental blocks (indicated by different colours). The figure illustrates the decreasing trend in body size in the focal instar across experimental blocks due to increasing degree of delay in egg hatching across the blocks. Hatching of eggs was not delayed in the first block. Part of the individuals of the last (4<sup>th</sup>) block completed an extra (7<sup>th</sup>) instar. These individuals are indicated with triangle symbols. Note that the instar V that was exposed to the experimental manipulations was not the penultimate instar, but the third-last one, if an extra larval instar was completed. Individuals having an extra larval instar were not excluded from the analyses because using initial instar V mass as a covariate in all analyses appropriately takes into account variation in number of instars that translates into size variation. There was also no difference in the relative mass increment between individuals having an extra instar and those not having it in the last experimental block (i.e. the only block where an extra instar was observed; data not shown).

**Table S1.** Sets of models with nonzero Akaike wights for the ln-transformed relative mass increment and growth rate as well as untransformed critical mass and growth duration in the penultimate (V) larval instar in *Orthosia gothica*.

| Trait                   | Model <sup>a</sup> | df | AIC <sub>c</sub> | ΔAIC <sub>c</sub> | Akaike weight |
|-------------------------|--------------------|----|------------------|-------------------|---------------|
| Relative mass increment | 12347              | 10 | -188.75          | 0                 | 0.33          |
|                         | 123467             | 12 | -187.39          | 1.36              | 0.17          |
|                         | 1234               | 9  | -187.14          | 1.61              | 0.15          |
|                         | 123                | 8  | -186.35          | 2.40              | 0.10          |
|                         | 12346              | 11 | -186.00          | 2.75              | 0.08          |
|                         | 123457             | 12 | -184.93          | 3.82              | 0.05          |
|                         | 1234567            | 14 | -183.45          | 5.30              | 0.02          |
|                         | 12345              | 11 | -183.38          | 5.37              | 0.02          |
|                         | 1235               | 10 | -182.92          | 5.83              | 0.02          |
|                         | 124                | 8  | -182.91          | 5.84              | 0.02          |
|                         | 12                 | 7  | -182.23          | 6.52              | 0.01          |
|                         | 123456             | 13 | -182.13          | 6.62              | 0.01          |
|                         | 1246               | 10 | -181.88          | 6.87              | 0.01          |
| Critical mass           | 1235               | 10 | 1217.19          | 0                 | 0.56          |
|                         | 12345              | 11 | 1218.89          | 1.70              | 0.24          |
|                         | 123457             | 12 | 1220.70          | 3.51              | 0.10          |
|                         | 123456             | 13 | 1221.28          | 4.09              | 0.07          |
|                         | 1234567            | 14 | 1222.97          | 5.78              | 0.03          |
| Growth rate             | 1246               | 10 | -136.86          | 0                 | 0.44          |
|                         | 12346              | 11 | -135.52          | 1.34              | 0.22          |
|                         | 123467             | 12 | -134.12          | 2.74              | 0.11          |
|                         | 124                | 8  | -132.54          | 4.33              | 0.05          |
|                         | 123456             | 13 | -132.44          | 4.42              | 0.05          |
|                         | 14                 | 6  | -131.89          | 4.97              | 0.04          |
|                         | 1234567            | 14 | -131.12          | 5.74              | 0.02          |
|                         | 1234               | 9  | -130.85          | 6.02              | 0.02          |
|                         | 134                | 7  | -130.03          | 6.83              | 0.01          |
|                         | 12347              | 10 | -129.47          | 7.39              | 0.01          |
|                         | 1347               | 8  | -128.55          | 8.32              | 0.01          |
| Growth duration         | 23467              | 11 | 179.48           | 0                 | 0.18          |
|                         | 123467             | 12 | 179.52           | 0.04              | 0.18          |
|                         | 246                | 9  | 179.82           | 0.34              | 0.15          |
|                         | 1246               | 10 | 179.85           | 0.38              | 0.15          |
|                         | 12346              | 11 | 181.58           | 2.10              | 0.06          |
|                         | 2346               | 10 | 181.62           | 2.14              | 0.06          |
|                         | 234567             | 13 | 182.90           | 3.42              | 0.03          |
|                         | 347                | 7  | 183.09           | 3.61              | 0.03          |
|                         | 1234567            | 14 | 183.10           | 3.62              | 0.03          |
|                         | 4                  | 5  | 183.22           | 3.74              | 0.03          |
|                         | 34                 | 6  | 184.73           | 5.25              | 0.01          |

|  |          |    |        |      |      |
|--|----------|----|--------|------|------|
|  | 23456    | 12 | 184.99 | 5.51 | 0.01 |
|  | 1347     | 8  | 185.01 | 5.53 | 0.01 |
|  | 14       | 6  | 185.11 | 5.63 | 0.01 |
|  | 123456   | 13 | 185.12 | 5.64 | 0.01 |
|  | 2345678  | 15 | 185.22 | 5.74 | 0.01 |
|  | 12345678 | 16 | 185.23 | 5.76 | 0.01 |
|  | 134      | 7  | 186.60 | 7.12 | 0.01 |

<sup>a</sup> The numbers refer to model terms as follows: 1=initial mass, 2=oxygen manipulation ( $pO_2$ ), 3=sex, 4=temperature manipulation (T), 5=  $pO_2 \times \text{sex}$ , 6=  $pO_2 \times T$ , 7=sex  $\times T$ , 8=  $pO_2 \times \text{sex} \times T$
